# Supplementary material for: Graphene oxide and low-density polyethylene based highly sensitive biomimetic soft actuators powered by multiple clean energies of humidity and light
Source: Royal Society of Chemistry journal article supplement (doi:10.1039/d3ta01690k), 2023-01-01
Supplement: d3ta01690k7.pdf [file d3ta01690k7.pdf]

## Supporting Information

### Graphene Oxide- and Low-Density Polyethylene Based Highly Sensitive Biomimetic Soft Actuators Powered by Multiple Clean Energies of Humidity and Light

Yiwei Zhang, Ruiqian Wang, Wenjun Tan, Lianchao Yang, Xiaolong Lv, Xiaodong Wang, Feifei Wang and Chuang Zhang\*

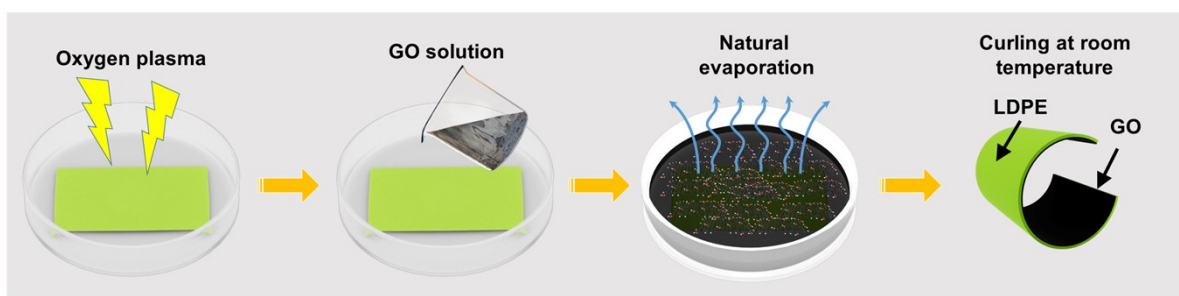

Fig. S1 Manufacturing process of the GO/LDPE actuator.

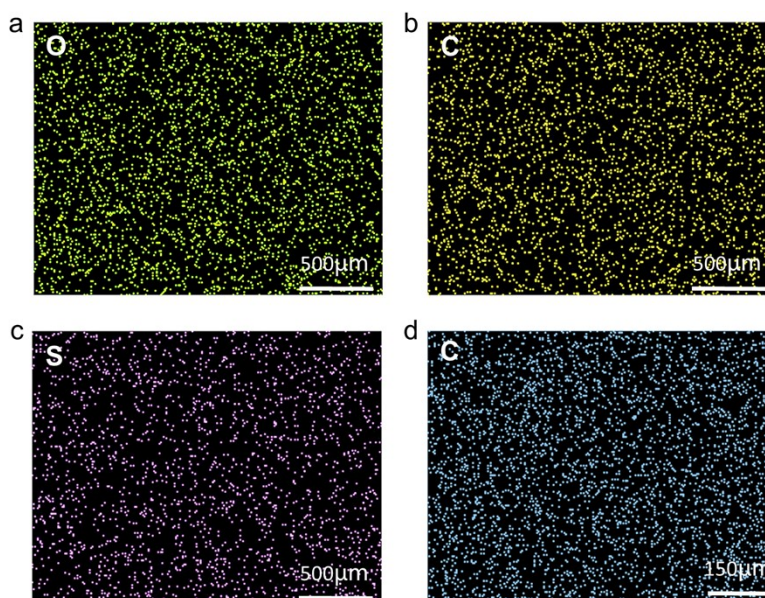

Fig. S2 Characterization of actuator surface elements. (a) Distribution of oxygen on the surface of GO. (b) Distribution of oxygen on the surface of GO. (c) Distribution of sulfur on the surface of GO. (d) Distribution of carbon on the LDPE surface.

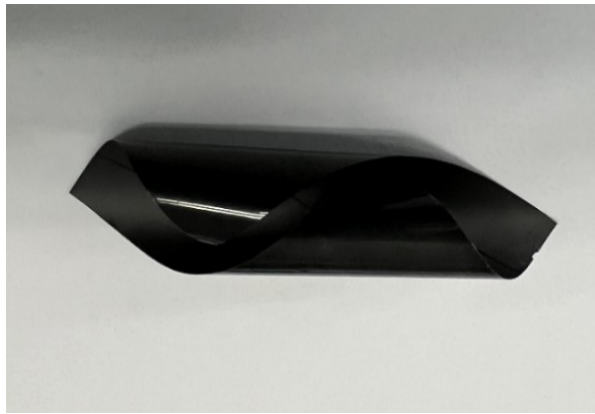

**Fig. S3** Shape of the GO/LDPE film before heat treatment.

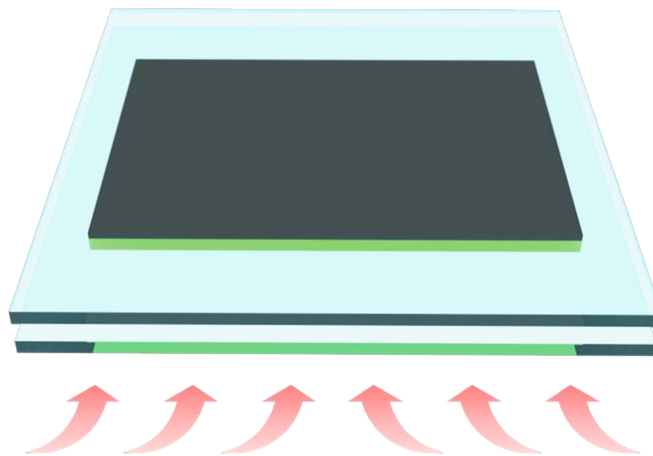

**Fig. S4** Schematic diagram of heat treatment.

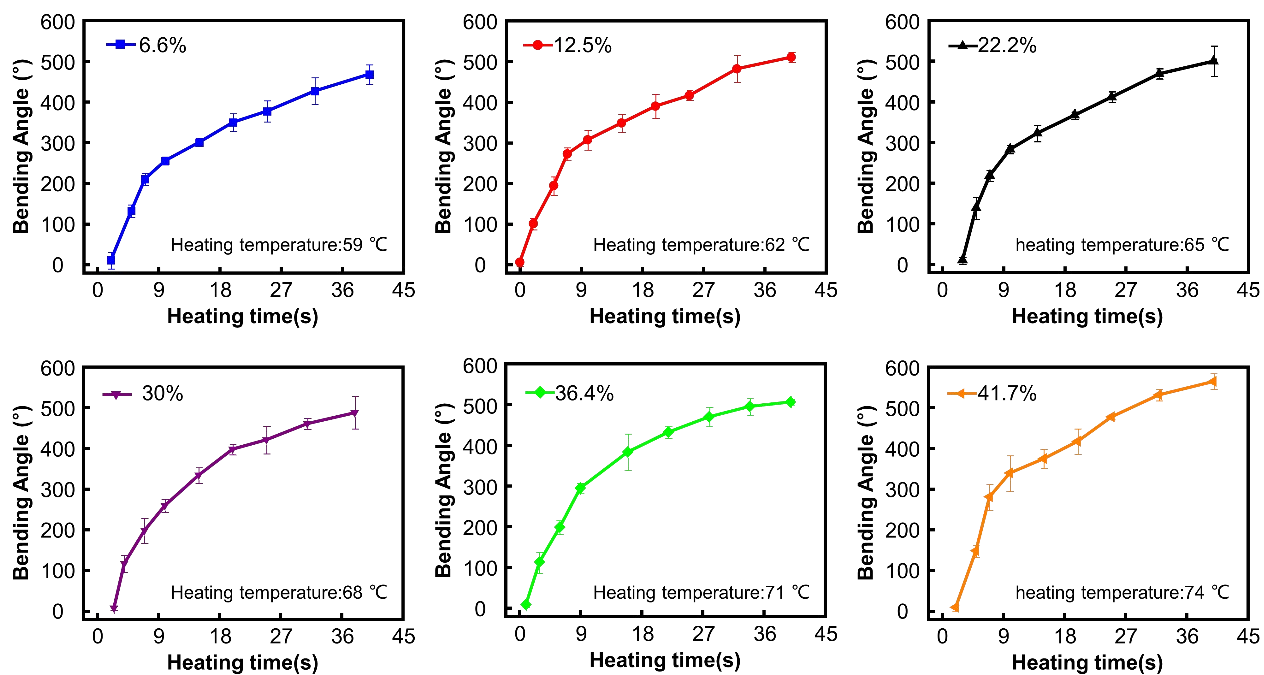

**Fig. S5** Thermal adjustment curve of the GO/LDPE actuator based on different GO contents.

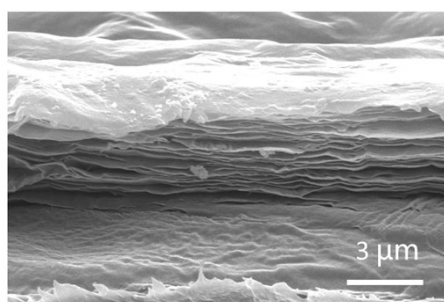

**Fig. S6** Cross-sectional SEM image of the GO-22.2/LDPE actuator after the cycling tests for 40 cycles.

**Tab.S1** Performance comparison of soft actuator with light and humidity response characteristics

| Response type      | Materials                             | Structure | Thickness ( $\mu\text{m}$ )           | Max bending angle ( $^\circ$ )<br>(Stimuli intensity) | Velocity of bending ( $^\circ/\text{s}$ ) | Ref. |
|--------------------|---------------------------------------|-----------|---------------------------------------|-------------------------------------------------------|-------------------------------------------|------|
| Light              | MXC/PDMS                              | Bilayer   | 90                                    | 219<br>(NIR 500 mW $\text{cm}^{-2}$ )                 | 25                                        | 1    |
|                    | TDW/LDPE                              | Bilayer   | /                                     | 160<br>(NIR 120 mW $\text{cm}^{-2}$ )                 | 5.33                                      | 2    |
|                    | GO                                    | Monolayer | /                                     | 183<br>(NIR 600 mW $\text{cm}^{-2}$ )                 | 36.68                                     | 3    |
|                    | I-MXene/PE                            | Bilayer   | $\sim 3$                              | 700,<br>(NIR 200 mW $\text{cm}^{-2}$ )                | 333.3                                     | 4    |
|                    | WSG                                   | Bilayer   | 150                                   | 80<br>(NIR 970 mW $\text{cm}^{-2}$ )                  | 15.22                                     | 5    |
|                    | CE/HEPCP/MW CM-2CNT (LHM)             | Monolayer | /                                     | 180<br>(NIR 320 mW $\text{cm}^{-2}$ )                 | 90                                        | 6    |
|                    | Ti <sub>3</sub> C <sub>2</sub> Tx/PET | Bilayer   | /                                     | 90,<br>(NIR 500 mW $\text{cm}^{-2}$ )                 | 14.62                                     | 7    |
|                    | MXene/LDPE                            | Bilayer   | 45.6                                  | 390<br>(NIR 172 mW $\text{cm}^{-2}$ )                 | 50.57                                     | 8    |
|                    | GO/EC                                 | Bilayer   | 40                                    | 430<br>(NIR 140 mW $\text{cm}^{-2}$ )                 | 44                                        | 9    |
| Humidity           | MXene/CNF/PDA                         | Monolayer | 24                                    | 176<br>( $\Delta\text{RH}$ 40%)                       | 106.25                                    | 10   |
|                    | PEG-COF                               | Bilayer   | 80                                    | 120<br>( $\Delta\text{RH}$ 34%)                       | 5.22                                      | 11   |
|                    | RO/GM                                 | Bilayer   | /                                     | 300<br>(Steam on the water)                           | 5                                         | 12   |
|                    | GO/ SU-8                              | Bilayer   | 15                                    | 357<br>( $\Delta\text{RH}$ 74%)                       | 13.73                                     | 13   |
|                    | CNF/GO/CNT                            | Monolayer | /                                     | 180<br>( $\Delta\text{RH}$ 40%)                       | 225                                       | 14   |
|                    | GO                                    | Monolayer | 20-100                                | 600<br>( $\Delta\text{RH}$ 74%)                       | 85.7                                      | 15   |
|                    | CMC/MXene/Al <sup>3+</sup>            | Monolayer | 12                                    | 180<br>( $\Delta\text{RH}$ 80%)                       | 92.1 $^\circ/\text{s}$                    | 16   |
|                    | GO                                    | Monolayer | $\sim 55$                             | 1100<br>( $\Delta\text{RH}$ 60%)                      | 47.6                                      | 17   |
| Light/<br>humidity | GO/WAX                                | Bilayer   | 14.41                                 | 360<br>(NIR 78mW $\text{cm}^{-2}$ )                   | 225                                       | 18   |
|                    |                                       |           |                                       | 360<br>( $\Delta\text{RH}$ 20%)                       | 90                                        |      |
|                    | CNT-Nafion/PE                         | Bilayer   | 50                                    | 220<br>(NIR 100 mW $\text{cm}^{-2}$ )                 | 71.88                                     | 19   |
|                    |                                       |           |                                       | 1031<br>( $\Delta\text{RH}$ 30%)                      | /                                         |      |
|                    | PG/Nafion                             | Bilayer   | 48.1                                  | 301,<br>(NIR 1200mW $\text{cm}^{-2}$ )                | /                                         | 20   |
|                    |                                       |           |                                       | 343<br>( $\Delta\text{RH}$ 50%)                       | /                                         |      |
|                    | GO/MXene                              | Bilayer   | 4.5                                   | 116<br>(NIR 140 mW $\text{cm}^{-2}$ )                 | 55.5                                      | 20   |
|                    |                                       |           |                                       | 730<br>( $\Delta\text{RH}$ 74%)                       | 15                                        |      |
|                    | PDMS-CNT/CS                           | Bilayer   | 301.9 $\pm$ 7.2                       | 384<br>(NIR 500 mW $\text{cm}^{-2}$ )                 | 18.45                                     | 21   |
|                    |                                       |           | 391<br>( $\Delta\text{RH}$ 92%)       | 12.5                                                  |                                           |      |
| PVDF-CB/PEA/PAM    | Bilayer                               | 150       | 199<br>(NIR 250mW $\text{cm}^{-2}$ )  | 331.67                                                | 22                                        |      |
|                    |                                       |           | 292<br>( $\Delta\text{RH}$ 55%)       | 18.25                                                 |                                           |      |
| GO/PET             | Bilayer                               | 100       | 130<br>(NIR 400 mW $\text{cm}^{-2}$ ) | 25                                                    | 23                                        |      |
|                    |                                       |           | 300                                   | /                                                     |                                           |      |

|          |         |       |                                        | ( $\Delta RH$ 80%) |           |
|----------|---------|-------|----------------------------------------|--------------------|-----------|
| RCF/PTFE | Bilayer | /     | 360<br>(NIR 300 mW cm <sup>-2</sup> )  | 36                 | 24        |
|          |         |       | 720<br>( $\Delta RH$ 25%)              | 11.08              |           |
| MGO/BOPP | Bilayer | 11.71 | 750,<br>(NIR 160 mW cm <sup>-2</sup> ) | 6.67               | 25        |
|          |         |       | 275<br>( $\Delta RH$ 65%)              | /                  |           |
| GO/PPy   | Bilayer | 25.2  | 120<br>(IR 83mW cm <sup>-2</sup> )     | 40.13              | 26        |
|          |         |       | 360<br>( $\Delta RH$ 19%)              | 40                 |           |
| GO/LDPE  | Bilayer | 37    | 500<br>(NIR 40 mW cm <sup>-2</sup> )   | 110                | This work |
|          |         |       | 500<br>( $\Delta RH$ 35%)              | 69.2               |           |

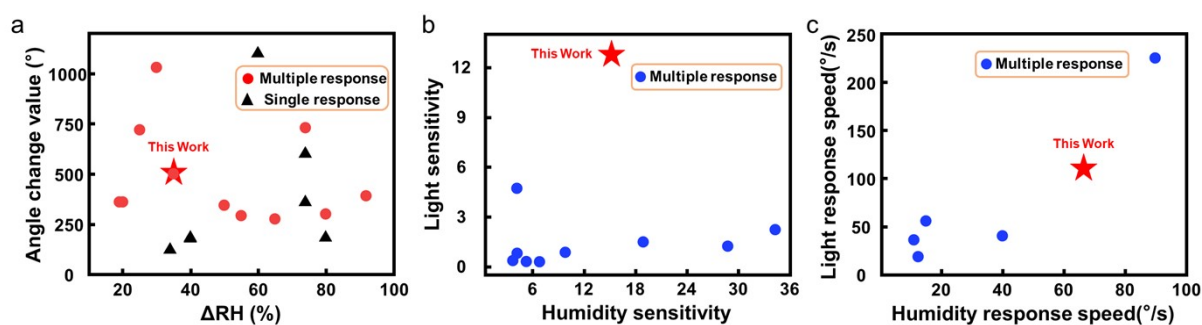

**Fig. S7** Comparison of response characteristics of actuators based on different materials: (a) Comparison of humidity performance of actuators with single or multiple response characteristics. (b) Comparison of light sensitivity and humidity sensitivity of actuators with multiple response characteristics, humidity sensitivity is the maximum bending angle divided by the desired  $\Delta RH$ ; light sensitivity is the maximum bending angle divided by the required illumination intensity. (c) Comparison of light response speed and humidity response speed of actuators with multiple response characteristics.

**Movie S1:** Inchworm-inspired soft robot crawls directionally on A4 paper.

**Movie S2:** Environmental simulation test, inchworm-inspired soft robot crawls on leaves.

**Movie S3:** Adaptive soft gripper grabs and releases balls, capsules and flowers under humidity control.

**Movie S4:** Adaptive soft gripper grabs and releases balls, capsules and flowers under the sequential control of humidity and NIR light.

**Movie S5:** Rotating robot with four rotors rotates under the synergistic stimulation of humidity and NIR light.

**Movie S6:** Rotating robot uses the co-stimulations of humidity and NIR light to drive the boat forward.

## References:

1. H. Q. Li, Z. Wu, Y. Q. Xing, B. J. Li and L. Liu, *Nano Energy*, 2022, **103**, 107821.
2. D. T. Zhang, K. Yang, X. Y. Liu, M. Luo, Z. Li, C. Z. Liu, M. Li, W. M. Chen and X. Y. Zhou, *Chem. Eng. J.*, 2022, **450**, 138013.
3. M. C. Weng, Y. W. Xiao, L. Q. Yao, W. Zhang, P. D. Zhou and L. Z. Chen, *Acs Appl. Mater. Inter.*, 2020, **12**, 55125-55133.
4. Y. Hu, L. L. Yang, Q. Y. Yan, Q. X. Ji, L. F. Chang, C. C. Zhang, J. Yan, R. R. Wang, L. Zhang, G. Wu, J. Sun, B. Zi, W. Chen and Y. C. Wu, *Acs Nano*, 2021, **15**, 5294-5306.
5. Z. W. Su, Y. J. Zhao, Y. Q. Huang, C. Y. Xu, X. L. Yang, B. R. Wang, B. B. Xu, S. Q. Xu and G. X. Bai, *Nano Res.*, 2022, **16**, 1313-1319.
6. Z. H. Yu, Y. M. Wang, J. Q. Zheng, S. Sun, Y. Fu, D. Chen, W. H. Cai, D. Wang, H. M. Zhou and D. Q. Li, *Acs Appl. Mater. Inter.*, 2022, **14**, 16649-16657.
7. K. H. Yang, C. C. Fu, C. W. Li, Y. J. Ye, M. Ding, J. H. Zhou, Y. Bai, F. L. Jiao, J. Ma, Q. H. Guo and M. C. Weng, *Sens. Actuators, A*, 2022, **341**, 113553.
8. X. J. Luo, L. L. Li, H. B. Zhang, S. Zhao, Y. Zhang, W. Chen and Z. Z. Yu, *Acs Appl. Mater. Inter.*, 2021, **13**, 45833-45842.
9. D. Gao, M. F. Lin, J. Q. Xiong, S. H. Li, S. N. Lou, Y. Z. Liu, J. H. Ciou, X. R. Zhou and P. S. Lee, *Nanoscale Horiz.*, 2020, **5**, 730-738.
10. L. Y. Yang, J. Cui, L. Zhang, X. R. Xu, X. Chen and D. P. Sun, *Adv. Funct. Mater.*, 2021, **31**, 2101378.
11. T. H. Mao, Z. Y. Liu, X. X. Guo, Z. F. Wang, J. J. Liu, T. Wang, S. B. Geng, Y. Chen, P. Cheng and Z. J. Zhang, *Angew. Chem. Int. Edit.*, 2022, **62**, e202216318.
12. M. M. Kong, H. J. Li, Y. Liang, K. Cheng, X. Zhou, X. J. Song, Z. H. Yang, J. M. Xu and L. Zhao, *Sens. Actuators, B*, 2023, **380**, 133390.
13. J. N. Ma, Y. L. Zhang, D. D. Han, J. W. Mao, Z. D. Chen and H. B. Sun, *Natl. Sci. Rev.*, 2020, **7**, 775-785.
14. J. Wei, S. Jia, J. Guan, C. Ma and Z. Q. Shao, *Acs Appl. Mater. Inter.*, 2021, **13**, 54417-54427.
15. Y. L. Zhang, Y. Q. Liu, D. D. Han, J. N. Ma, D. Wang, X. B. Li and H. B. Sun, *Adv. Mater.*, 2019, **31**, 1901585.
16. J. Wei, S. Jia, C. Ma, J. Guan, C. X. Yan, L. B. Zhao and Z. Q. Shao, *Chem. Eng. J.*, 2023, **451**, 138565.
17. M. T. Wang, Q. C. Li, J. X. Shi, X. Y. Cao, L. Z. Min, X. F. Li, L. L. Zhu, Y. H. Lv, Z. Qin, X. Y. Chen and K. Pan, *Acs Appl. Mater. Inter.*, 2020, **12**, 33104-33112.
18. Y. Dong, L. Wang, N. Xia, Y. Wang, S. J. Wang, Z. X. Yang, D. D. Jin, X. Z. Du, E. W. Yu, C. F. Pan, B. F. Liu and L. Zhang, *Nano Energy*, 2021, **88**, 106254.
19. L. F. Chang, D. P. Wang, Z. S. Huang, C. F. Wang, J. Torop, B. Li, Y. J. Wang, Y. Hu and A. Aabloo, *Adv. Funct. Mater.*, 2023, **33**, 2212341.
20. J. H. Kim, J. B. Pyo and T. S. Kim, *Adv. Mater. Interfaces*, 2020, **7**, 2001051.
21. H. Xu, X. Z. Xu, J. W. Xu, S. P. Dai, X. Dong, F. Han, N. Y. Yuan and J. N. Ding, *J. Mater. Chem. B*, 2019, **7**, 7558-7565.
22. J. J. Li, M. L. Wang, Z. P. Cui, S. Y. Liu, D. Y. Feng, G. K. Mei, R. Zhang, B. G. An, D. Qian, X. Zhou and Z. F. Liu, *J. Mater. Chem. A*, 2022, **10**, 25337-25346.
23. K. H. Yang, Z. D. Tang, Y. J. Ye, M. Ding, P. Q. Zhang, Y. K. Zhu, Q. H. Guo, G. Q. Chen and M. C. Weng, *J. Appl. Polym. Sci.*, 2022, **139**, e52014.
24. Y. N. Li, J. Wang, H. X. Li, L. L. Huang, L. H. Chen, Y. H. Ni and Q. H. Zheng, *Appl. Surf. Sci.*, 2022, **572**, 151502.
25. L. Li, G. W. Jia, W. W. Huang, J. Y. Zhou, C. X. Li, J. X. Han, Y. Zhang and X. J. Zhou, *Sens. Actuators, A*, 2023, **351**, 114149.

26. Y. Dong, J. Wang, X. K. Guo, S. S. Yang, M. O. Ozen, P. Chen, X. Liu, W. Du, F. Xiao, U. Demirci and B. F. Liu, *Nat. Commun.*, 2019, **10**, 4087.
